1 **The direct interaction with transcriptional factor TEAD4 implied a**  
2 **straightforward regulation mechanism of tumor suppressor NF2**

3

4 Liqiao Hu<sup>1, #</sup>, Mengying Wu<sup>1, #</sup>, Lingli He<sup>2, #</sup>, Liang Yuan<sup>3</sup>, Lingling Yang<sup>1</sup>, Bin Zhao<sup>5,6</sup>, Lei  
5 Zhang<sup>2,3,4</sup>, Xiaojing He<sup>1, \*</sup>

6

7 <sup>1</sup>Key Laboratory of Molecular Biophysics of the Ministry of Education, College of Life  
8 Science and Technology, Huazhong University of Science and Technology, Wuhan 430074,  
9 China

10 <sup>2</sup>State Key Laboratory of Cell Biology, Center for Excellence in Molecular Cell Science,  
11 Shanghai Institute of Biochemistry and Cell Biology, Chinese Academy of Sciences,  
12 University of Chinese Academy of Sciences, Shanghai 200031, China

13 <sup>3</sup>College of Life Science and Technology, ShanghaiTech University, Shanghai 201210,  
14 China

15 <sup>4</sup>School of Life Science, Hangzhou Institute for Advanced Study, University of Chinese  
16 Academy of Sciences, Chinese Academy of Sciences, Hangzhou310024, China

17 <sup>5</sup>The MOE Key Laboratory of Biosystems Homeostasis and Protection and Innovation  
18 Center for Cell Signaling Network, Life Sciences Institute, Zhejiang University, Hangzhou,  
19 Zhejiang 310058, China

20 <sup>6</sup>Cancer Center, Zhejiang University, Hangzhou, Zhejiang 310058, China

21 #These authors contributed equally

22 \* Correspondence: Xiaojing He, [hexj@hust.edu.cn](mailto:hexj@hust.edu.cn)

23

24 **Abstract**

25 As an output effector of Hippo signaling pathway, the transcription factor TEAD and co-  
26 activator YAP play crucial functions in promoting cell proliferation and organ size. The  
27 tumor suppressor NF2 has been shown to activate LATS1/2 kinases and interplay with  
28 Hippo pathway to suppress YAP-TEAD complex. But, whether and how NF2 could directly  
29 regulate TEAD remains unknown. We identified a direct link and physical interaction  
30 between NF2 and TEAD4. NF2 interacted with TEAD4 through its FERM domain and the  
31 C-terminal tail, and decreased protein stability of TEAD4 independently of LATS1/2 and  
32 YAP. Furthermore, NF2 inhibited TEAD4 palmitoylation and retained the cytoplasmic  
33 translocation of TEAD4, resulting in ubiquitination and dysfunction of TEAD4. Moreover,  
34 the interaction with TEAD4 is required for NF2 function to suppress cell proliferation. These  
35 findings revealed a new role of NF2 as a binding partner and inhibitor of the transcription  
36 factor TEAD, and would shed light on an alternative mechanism of how NF2 functions as  
37 a tumor suppressor through the Hippo signaling cascade.

38 **Keywords:**

39 Hippo Pathway, NF2, TEAD4, Protein-protein Interaction, Palmitoylation, Tumor  
40 suppressor

41

## 42 Introduction

43 In multicellular animals, cell proliferation and death must be precisely coordinated to  
44 ensure proper organ size and tissue homeostasis. The Hippo signaling pathway was  
45 initially identified as a key determinant of organ size (Harvey et al., 2003; Huang et al.,  
46 2005; Pan, 2010; Wu et al., 2003). This pathway is highly conserved from *Drosophila* to  
47 mammals (Yu et al., 2015; Zhao et al., 2010a). The Hippo pathway constitutes a major  
48 kinase cascade, including the mammalian STE20-like protein kinase 1/2 (MST1/2) and  
49 large tumor suppressor kinase 1/2 (LATS1/2), which inhibit two transcriptional co-activators,  
50 Yes-associated protein (YAP) and transcriptional co-activator with PDZ-binding motif (TAZ),  
51 via phosphorylation (Zhao et al., 2010b). Dephosphorylated and activated YAP/TAZ  
52 translocate into the nucleus, where they interact with the TEA domain transcription factors  
53 (TEADs), and induce the expression of target genes, such as *CTGF* and *CYR61*, to  
54 modulate cell proliferation, differentiation, and tumorigenesis (Ota and Sasaki, 2008;  
55 Zhang et al., 2008; Zhao et al., 2008). Unlike *Drosophila*, which expresses only one TEAD  
56 homolog, Scalloped (Sd), there are four TEAD homologs in mammals (TEAD1, TEAD2,  
57 TEAD3, and TEAD4). TEADs share a similar domain structure: a DNA-binding domain  
58 (DBD) at the N-terminus and a YAP-binding domain (YBD) at the C-terminus (Huh et al.,  
59 2019; Zhang et al., 2008). Dysregulation of the Hippo pathway has been linked to many  
60 human diseases, and targeted inhibition of the YAP-TEAD transcriptional complex for  
61 cancer therapy is being actively explored (Dey et al., 2020; Yu et al., 2015; Zheng and Pan,  
62 2019).

63 In addition to YAP/TAZ, the transcriptional activity of TEADs is regulated by different  
64 binding factors, including VGLL4, glucocorticoid receptor (GR), TCF4, and AP-1 (He et al.,  
65 2019; Jiao et al., 2017, 2014; Liu et al., 2016). Specifically, VGLL4 directly competes with  
66 YAP/TAZ for binding to TEADs, thereby suppressing their transcriptional activity (Deng and  
67 Fang, 2018). P38 binding-dependent cytoplasmic translocation of TEADs provides spatial  
68 modulation of transcriptional activity (Lin et al., 2017). Post-translational modifications of  
69 TEADs, such as phosphorylation and palmitoylation, govern their protein stability and  
70 activity (Chan et al., 2016; Gupta et al., 2000; Jiang et al., 2001; Noland et al., 2016). Four  
71 TEAD homologs have been found to be palmitoylated in mammalian cells (Kim and  
72 Gumbiner, 2019; Mesrouze et al., 2017), and palmitoylation of TEAD is critical for protein  
73 stability and YAP-TEAD interaction (Noland et al. 2016; Chan et al. 2016). Although  
74 targeting TEAD palmitoylation is considered as a potential strategy for Hippo pathway  
75 molecular therapy (Bum-Erdene et al., 2019; Pobbati et al., 2015), the mechanisms  
76 regulating TEAD palmitoylation and depalmitoylation remain unclear.

77 Neurofibromin 2 (NF2), also called Merlin, is an **Ezrin**, **Radixin**, and **Moesin** (ERM)  
78 family protein that acts as a tumor suppressor, and the development of schwannoma,  
79 meningioma, ependymoma, and malignant mesothelioma in humans is highly associated  
80 with loss-function and mutations of *NF2* (Chen et al., 2017; Cheng et al., 1999;  
81 Kalamarides, 2002). NF2 functions in the Hippo pathway by responding to extracellular  
82 stimuli, such as cell density and osmotic stress (Cooper and Giancotti, 2014; Hong et al.,  
83 2020). NF2 associates with LATS1/2, thus activating the major kinase cascade of Hippo  
84 pathway to inhibit YAP/TAZ and suppress cell proliferation and tumorigenesis (Yin et al.,

85 2013). Several binding partners of NF2, including Angiomotin (AMOT) and E3 ubiquitin  
86 ligase CRL4<sup>DCAF1</sup>, are also involved in modulating Hippo pathway (Li et al., 2010, 2015).  
87 However, whether NF2 directly regulates TEADs remains unclear and how NF2 modulates  
88 the Hippo pathway is not yet fully understood.

89 In this study, we identified the physical interaction between tumor suppressor NF2 and  
90 transcription factor TEAD4. We found that NF2 directly interacted with TEAD4 through its  
91 FERM domain and the C-terminal tail, and decreased protein stability of TEAD4  
92 independently of LATS1/2 and YAP. We further revealed the molecular mechanism that  
93 NF2 inhibited TEAD4 palmitoylation and retained its cytoplasmic translocation via the direct  
94 interaction, resulting in ubiquitination and dysfunction of TEAD4. Moreover, the TEAD4  
95 interaction is required for NF2 function to suppress tumor cell proliferation. These findings  
96 implied a new role of NF2 as a binding partner and inhibitor of TEADs, and expanded the  
97 molecular mechanism of how NF2 functions as a tumor suppressor.

## 98 **Results**

### 99 **NF2 decreases the protein levels of TEADs independently of LATS1/2 and YAP**

100 As an upstream activator in the Hippo signaling pathway, the tumor suppressor NF2  
101 has been shown to activate LATS1/2 kinases and suppress YAP function (Yin et al., 2013).  
102 NF2 also interacts with other regulators, AMOT and DCAF1, to modulate the Hippo  
103 pathway (Li et al., 2010, 2015). We were curious whether other effectors might be directly  
104 involved in NF2 function. Firstly, we examined the protein levels of major Hippo pathway  
105 components in HEK293T cells with NF2 overexpression. Consistent with a previous report

106 (Yin et al., 2013), NF2 promoted YAP phosphorylation (**Figure 1A**). Unexpectedly, the  
107 protein levels of TEAD4 were markedly reduced along with NF2 overexpression (**Figure**  
108 **1A**). We then confirmed this result by silence and rescue experiments. Depletion of *NF2*  
109 by small interfering RNA (siRNA) induced an increase in both TEAD2 and TEAD4 protein  
110 levels, and the re-expression of NF2 decreased their protein levels again (**Figure**  
111 **supplement 1A**). Notably, the mRNA levels of TEADs were unaffected by NF2  
112 overexpression (**Figure supplement 1B**). These results suggest a hypothesis that NF2  
113 may regulate protein levels of TEADs instead of transcription levels.

114 We then examined the protein stability of TEAD4 in the cells treated with  
115 cycloheximide (CHX) to inhibit *de novo* protein synthesis. In comparison with control cells,  
116 knockdown of *NF2* significantly increased the half-life of TEAD4 protein (**Figure 1B and**  
117 **1C**). The protein levels of other components in Hippo pathway, YAP and Lats1/2, were also  
118 detected, and exhibited similar levels in both control and NF2 knockdown cells. Thus, it  
119 suggests that NF2 decreased TEAD4 protein level by altering the protein stability of TEAD4.

120 Since YAP is a well-known major partner of TEAD4, we then asked if YAP is involved  
121 in the regulation of TEAD4 protein stability by NF2. We generated YAP knockout (KO)  
122 HeLa cells by CRISPR/Cas9, in which successful YAP KO were verified by western blotting  
123 (**Figure 1D**). The knockdown of *NF2* robustly increased TEAD4 protein levels in both WT  
124 and YAP KO cells (**Figure 1D**), and NF2 overexpression also decreased TEAD4 protein  
125 levels in YAP KO cells (**Figure supplement 1C**), indicating that NF2 decreased the protein  
126 levels of TEADs independently of YAP. We also wondered if LATS1/2 might be involved in  
127 the regulation of TEAD4 protein level by NF2. Again, in both control and *LATS1/2* KO cells,

128 knockdown of *NF2* increased the TEAD4 protein expression levels (**Figure 1E**). Taken  
129 together, our results suggest a direct regulation that NF2 could decrease the protein level  
130 and stability of TEAD4 independently of LATS1/2 and YAP.

### 131 **NF2 physically interacts with TEAD4 through its FERM domain and C-terminal tail**

132 To further explore the direct link between NF2 and TEAD4, we purified the YBD domain of  
133 TEAD4 (TEAD4-YBD) with SUMO-His tag and full-length NF2 with GST tag from  
134 *Escherichia coli*, and examined their interaction using a glutathione S-transferase (GST)  
135 pull-down assay. Indeed, TEAD4-YBD strongly bound to GST-NF2 *in vitro* (**Figure 2A**),  
136 highly suggesting a direct and physical interaction between NF2 and TEAD4.

137 According to the domain organization of NF2 protein which containing the N-terminal  
138 FERM domain, central coiled-coil domain, and C-terminal tail(Li et al., 2015), seven  
139 truncations were constructed to test their interaction with TEAD4-YBD (**Figure 2A and**  
140 **supplement 2A**). In the GST pull-down assay, both the N-terminal FERM domain (1-341  
141 aa) and C-terminal half (342-595 aa) remained to interact with TEAD4-YBD at similar level  
142 *in vitro* (**Figure 2A**). Among the C-terminal half, the tail region (C-tail, 550-595 aa) still  
143 bound to TEAD4 (**Figure supplement 2A**). The interaction between NF2 and TEAD4 full  
144 length was verified by co-immunoprecipitation assay in HEK293T cells (**Figure 2B**), which  
145 further confirmed the direct and physical interaction between NF2 and TEAD4.

146 Intramolecular interaction of NF2 has been suggested to be formed by FERM domain  
147 and C-terminal tail (Chinthalapudi et al., 2018; Li et al., 2015; Sher et al., 2012). We then  
148 wondered if the intramolecular interaction of NF2 might affect its interaction with TEAD4.  
149 In comparison with C-terminal fragments alone, co-incubation of FERM domain markedly

150 enhanced their binding to TEAD4 (**Figure 2C**), indicating that the intramolecular interaction  
151 of NF2 increased the interaction with TEAD4. Moreover, the A585W mutation of NF2, which  
152 could stabilize the intramolecular interaction and be inactive for LATS1/2 interaction (Li et  
153 al., 2015), exhibited stronger binding capacity to TEAD4 than NF2-WT in MBP pull-down  
154 assay (**Figure 2D**). Taken together, these binding results suggest that NF2 directly  
155 interacts with TEAD4 through both FERM domain and the C-terminal tail (**Figure 2E**).

#### 156 **Characterization of the interaction between NF2 and TEAD4**

157 Given that NF2 is a novel binding partner of TEAD4, we next characterized the  
158 interaction interface of NF2. Based on the crystal structure of NF2(Li et al., 2015), single  
159 or combined point mutations on the structural surface of NF2 protein were designed for the  
160 binding screen (**Figure supplement 2B**). Collectively, the binding assay pinpointed that  
161 L297, I301, and H304 residues in the FERM domain F3 lobe, L582 and F591 residues in  
162 the C-tail of NF2 mediated its interaction with TEAD4 (**Figure 3A, 3B and supplement**  
163 **2C**). We then generated two grouped mutants NF2-5A (L297A/I301A/H304A/L582A/F591A)  
164 and NF2-4A-del (L297A/I301A/H304A/L582A and deletion of 590-595 aa) (**Figure**  
165 **supplement 2C**), and both mutants abolished their ability to interact with TEAD4 in co-  
166 immunoprecipitation assay (**Figure 3C**). Thus, the key residues L297/I301/H304 on FERM  
167 domain and L582/F591 on C-tail were identified to mediate the interaction between NF2  
168 and TEAD4.

169 We then asked if these binding-deficient mutants affect the function of NF2 to  
170 decrease TEAD4 protein level. We introduced NCI-H226 cell line, an NF2-non-expressing  
171 malignant pleural mesothelioma (MPM) cell line, which could exclude the effect of



172 endogenous NF2. In comparison with control cells, overexpression of NF2-WT decreased  
173 TEAD4 protein level to 60% (**Figure 3D**). Consistent with their interaction deficiency  
174 with TEAD4, NF2-5A and NF2-4A-del mutants restored TEAD4 protein level around 85%  
175 (**Figure 3D**), suggesting that NF2 decreased TEAD4 protein level via direct interaction.

176 Since both YAP and NF2 bind to the YBD domain of TEAD4, we explored whether  
177 NF2 and YAP bound to the same surface on TEAD4. The *in vitro* competitive binding assay  
178 was performed and showed that NF2 gradually competed off TEAD4 from GST-YAP in a  
179 dose-dependent manner (**Figure 3E**), indicating that NF2 and YAP occupied the same  
180 interface on TEAD4-YBD domain and NF2 potentially inhibited the formation of YAP-TEAD  
181 complex.

#### 182 **NF2 induces the cytoplasmic retention of TEAD4 via interaction**

183 TEAD4 functions as a transcription factor in the nucleus, while NF2 is a plasma  
184 membrane-associated protein (Yin et al., 2013). To characterize the spatial localization of  
185 the NF2-TEAD4 complex in cell, we performed bimolecular fluorescence complementation  
186 (BiFC) assays, in which two non-fluorescent half fragments of the yellow fluorescent  
187 protein (YFP) were fused with two binding partners, respectively. No fluorescence was  
188 detected upon co-expression of NF2-nYFP and TEAD4-nYFP in HEK293 cells, similar to  
189 control cells expressing NF2-cYFP or TEAD4-cYAP alone (**Figure 4A**). Co-expression of  
190 NF2-cYFP and LATS2-nYFP, which are well-known binding partners, resulted in  
191 fluorescence at the plasma membrane (**Figure 4A**). Co-expression of NF2-cYFP and  
192 TEAD4-nYFP also resulted in YFP signals at the plasma membrane, but more in the  
193 cytoplasm (**Figure 4A**), suggesting that they form a complex in the cytoplasm rather than

194 in the nucleus. Fluorescence signals were sequentially quantified by flow cytometry  
195 **(Figures 4B and supplement 3A)**, validating that NF2 strongly interacted with TEAD4 in  
196 cells, as NF2 and LATS2 did.

197 To examine whether NF2 induces the translocation of TEAD4 via the direct interaction,  
198 we detected the subcellular localization of TEAD4 by immune-fluorescence in the *NF2-KO*  
199 HEK293A cells with overexpression of NF2-WT and NF2-5A, respectively. Compared with  
200 the nuclear localization of TEAD4 in *NF2-KO* cells, clear fluorescence signals of TEAD4  
201 were visible in the cytoplasm of NF2-WT expressed cells **(Figure 4C)**. However, the  
202 fluorescence signal of TEAD4 could not be detected in the cytoplasm of NF2-5A expressed  
203 cells **(Figure 4C)**, suggesting that NF2 induces the cytoplasmic retention of TEAD4  
204 through the direct interaction.

#### 205 **NF2 inhibits TEAD4 palmitoylation and presumably causes the sequential** 206 **ubiquitination**

207 As palmitoylation of TEAD4 is required for its protein stability (Chan et al., 2016; Kim  
208 and Gumbiner, 2019; Noland et al., 2016), we further investigated whether NF2 decreased  
209 protein stability of TEAD4 through palmitoylation. The *in vitro* auto-palmitoylation assays  
210 were performed by click chemistry-based methods (Zheng et al., 2015)**(Figure 5A)**.  
211 TEAD4 auto-palmitoylation was significantly decreased along with NF2 incubation, but not  
212 YAP **(Figure 5B and 5C)**, indicating that NF2 directly inhibited the auto-palmitoylation of  
213 TEAD4 *in vitro*.

214 Next, we examined the palmitoylation of TEAD4 in NCI-H226 cells using an acyl resin-  
215 assisted capture assay (Forrester et al., 2011) **(Figure 5D)**. Notably, the expression of NF2-

216 WT dramatically reduced TEAD4 palmitoylation, but NF2-5A and NF2-4A-del mutants  
217 effected TEAD4 palmitoylation slightly in cells (**Figure 5E**), implying that NF2 inhibited  
218 TEAD4 palmitoylation through direct interaction. Acyl-protein thioesterase 2 (APT2) is  
219 known as a major depalmitoylase of TEAD family proteins (Kim and Gumbiner, 2019). We  
220 found that the protein level of APT2 was not affected by the expression of NF2 (**Figure**  
221 **supplement 4A**), which excluded the possibility that NF2 reduced TEAD4 palmitoylation  
222 through APT2.

223 The depalmitoylation has been shown to trigger the degradation of TEAD protein  
224 mediated by E3 ligase CHIP (Kim and Gumbiner, 2019). The *in vitro* ubiquitination assays  
225 confirmed that non-palmitoylated mutant TEAD4-2CS (C335S/C367S) exhibited much  
226 higher ubiquitination levels than TEAD4-WT (**Figure 5F**). As positively relevant, TEAD4-  
227 2CS also exhibited stronger binding to NF2 than TEAD4-WT (**Figure 5G**), indicating that  
228 NF2 preferentially bound to non-palmitoylated form of TEAD4 and triggered its  
229 ubiquitination. Thus, NF2 inhibits TEAD4 palmitoylation and presumably causes the  
230 sequential ubiquitination of TEAD4.

### 231 **TEAD4 interaction is required for NF2 function to suppress cell proliferation.**

232 We then explored whether the direct interaction between NF2 and TEAD4 contributes  
233 to the tumor suppressor function of NF2. The BrdU incorporation assay was performed in  
234 *NF2* KO HEK293A cells to examine cell proliferation rates. In comparison with control cells,  
235 BrdU incorporation efficiency was dramatically increased in *NF2* KO cells, and significantly  
236 decreased with NF2-WT expression to a similar level with control cells (**Figure 6A and 6B**),  
237 confirming the tumor suppression role of NF2. However, the cells expressing NF2-5A

238 mutant kept a higher incorporation efficiency of BrdU around 90% of *NF2* KO cells (**Figure**  
239 **6A and 6B**). *NF2* suppressed cell proliferation as the tumor suppressor did, whereas the  
240 TEAD4-binding deficient mutant of *NF2* lacks the suppressor function, indicating that  
241 TEAD4 interaction is required for *NF2* function to suppress cell proliferation.

242 The cell proliferation suppression by *NF2* WT and mutant in *NF2* KO HEK293A cells  
243 was further measured by CCK-8 cell viability assay. Similar to the results from BrdU  
244 incorporation experiment, *NF2*-WT robustly decreased cell viability, while *NF2*-5A  
245 dramatically restored cell viability (**Figure 6C**). Since *NF2* can interact with and activate  
246 LATS1/2 in the Hippo signaling, we then examined whether *NF2*-5A mutant disrupt the  
247 interaction with LATS. Co-immunoprecipitation assay in *NF2* KO cells showed that *NF2*-  
248 5A mutant exhibited similar binding activity to LATS2, compared with *NF2*-WT (**Figure 6D**),  
249 indicating that the suppression defect of cell proliferation induced by *NF2*-5A is not related  
250 to LATS1/2 activation. Taken together, TEAD4 binding is required for *NF2* function to  
251 suppress cell proliferation, and is presumably caused by inhibiting TEAD4 palmitoylation.

## 252 **Discussion**

253 As a tumor suppressor, *NF2* senses cell-cell contact and regulates the Hippo pathway  
254 by activating LATS1/2 kinases, resulting in phosphorylation and cytoplasmic retention of  
255 YAP. Phosphorylated -YAP could not form complex with transcription factor TEAD in the  
256 nucleus, thereby inhibiting cell proliferation and suppressing tumor growth (Meng et al.,  
257 2016; Morrison et al., 2001; Okada et al., 2005; Yin et al., 2013). In contrast to the classic  
258 model of *NF2*, our finding proposed a straightforward regulation mechanism that *NF2*

259 directly associates with TEAD4 to promote the cytoplasmic retention and inhibit  
260 palmitoylation of TEAD4, resulting in dysfunction of TEAD4 and cell proliferation  
261 suppression (**Figure 6E**). We further validated 5 key residues of NF2 is required for TEAD4  
262 interaction and cell proliferation suppression. The missense mutations in these sites, such  
263 as L297V, H304Y, and F591L, are also found in various cancers (Bonilla et al., 2016; Zehir  
264 et al., 2017). NF-5A mutant lost the binding ability to TEAD4, but still bound to LATS2,  
265 which indicates that the function deficient of NF2-5A is because of the binding defect to  
266 TEAD instead of the classical Hippo pathway. This straightforward regulation would shed  
267 light on additional mechanism of how tumor suppressor NF2 functions, and also  
268 complement the regulation from LATS1/2 of Hippo pathway.

269 As transcription factor, TEAD family proteins form transcriptional complex with the  
270 major co-activators YAP/TAZ to activate the transcription of important target genes and  
271 promote cell proliferation and organ growth (Yu et al., 2015). Besides that, The inhibitory  
272 binding partners of TEADs, such as VGLL4, compete with YAP/TAZ and inhibit  
273 transcription activity of TEAD4 to suppress cell proliferation and tumor growth in multiple  
274 cancers (Jiao et al., 2014; Zhang et al., 2014). Our finding that tumor suppressor NF2  
275 inhibits TEAD4 palmitoylation via direct interaction, proposed a new role for the classical  
276 protein NF2 as the inhibitory binding partner of TEAD4, which might update the functional  
277 cognition of NF2 in the Hippo pathway.

278 Palmitoylation is essential for protein stability and transcription activity of TEADs  
279 (Chan et al., 2016; Noland et al., 2016), and NF2 has been shown to decrease the mRNA  
280 levels of fatty acid synthase (FASN) and induce depalmitoylation of TEADs (Kim and

281 Gumbiner, 2019). Alternatively, we found that palmitoylation of TEAD4 could also be  
282 inhibited by NF2 via direct interaction, which might reflect a novel role of NF2 in regulating  
283 palmitoylation and homeostasis of TEAD protein in cells.

284 The nuclear localization is also required for TEADs transcription activity. Early studies  
285 have reported the cytoplasmic translocation of TEADs induced by cell density and p38 (Lin  
286 et al., 2017). As a membrane-associated protein, NF2 has been shown to recruit and  
287 activate LATS1/2 kinases at plasma membrane (Yin et al., 2013). Here, we showed that  
288 NF2 also induced cytoplasmic translocation of TEAD4 via direct protein-protein interactions.  
289 The translocations of both LATS1/2 and TEADs induced by NF2 reach the same goal  
290 preventing TEADs transcription activity, highly suggested that this straightforward  
291 regulation could complement the function of Hippo pathway.

292 In summary, we identified the direct link and physical interaction between NF2 and  
293 TEAD4, which are important for NF2 function as tumor suppressor and TEADs protein  
294 homeostasis.

295

## 296 **Acknowledgements**

297 We thank Faxing Yu (Children's Hospital of Fudan University) for the *NF2* KO HEK293A  
298 cell line. This work was supported by National Key R&D Program of China  
299 [2019YFA0802000 to L.Z.], the National Natural Science Foundation of China [31970672  
300 to Xiaojing He, 32000496 to Liqiao Hu and 32030025 and 31625017 to L. Z.], Shanghai  
301 Leading Talents Program to L.Z. and China Postdoctoral Science Foundation  
302 [2019M662588 to Liqiao Hu].

303 *Author Contributions:* Conceptualization: LQ.H., L.Z. and XJ.H.; Methodology: LQ.H.,  
304 MY.W., LL.H., L.Y., B.Z., L.Z. and XJ.H.; Investigation: LQ.H., MY.W., LL.H. and L.Y.;  
305 Writing-Original Draft: LQ.H. and MY.W.; Writing– Review & Editing: LL.H., B.Z., L.Z. and  
306 XJ.H.; Funding Acquisition: LQ.H., L.Z. and XJ.H.; Resources: L.Z. and XJ.H.; Supervision:  
307 XJ.H.

### 308 **Competing Interests**

309 The authors declare no competing interests.

### 310 **References**

- 311 Bonilla X, Parmentier L, King B, Bezrukov F, Kaya G, Zoete V, Seplyarskiy VB, Sharpe HJ, McKee T,  
312 Letourneau A, Ribaux PG, Popadin K, Basset-Seguín N, Ben Chaabene R, Santoni FA,  
313 Andrianova MA, Guipponi M, Garieri M, Verdan C, Grosdemange K, Sumara O, Eilers M,  
314 Aifantis I, Michielin O, de Sauvage FJ, Antonarakis SE, Nikolaev SI. 2016. Genomic analysis  
315 identifies new drivers and progression pathways in skin basal cell carcinoma. *Nat Genet*  
316 **48**:398–406. doi:10.1038/ng.3525
- 317 Bum-Erdene K, Zhou D, Gonzalez-Gutierrez G, Ghosayel MK, Si Y, Xu D, Shannon HE, Bailey BJ,  
318 Corson TW, Pollok KE, Wells CD, Meroueh SO. 2019. Small-Molecule Covalent Modification  
319 of Conserved Cysteine Leads to Allosteric Inhibition of the TEAD · Yap Protein-Protein  
320 Interaction. *Cell Chemical Biology* **26**:378-389.e13. doi:10.1016/j.chembiol.2018.11.010
- 321 Chan P, Han X, Zheng B, DeRan M, Yu J, Jarugumilli GK, Deng H, Pan D, Luo X, Wu X. 2016.  
322 Autopalmitoylation of TEAD proteins regulates transcriptional output of the Hippo  
323 pathway. *Nat Chem Biol* **12**:282–289. doi:10.1038/nchembio.2036
- 324 Chen H, Xue L, Wang H, Wang Z, Wu H. 2017. Differential NF2 Gene Status in Sporadic Vestibular  
325 Schwannomas and its Prognostic Impact on Tumour Growth Patterns. *Sci Rep* **7**:5470.  
326 doi:10.1038/s41598-017-05769-0
- 327 Cheng JQ, Lee W-C, Klein MA, Cheng GZ, Jhanwar SC, Testa JR. 1999. Frequent mutations of NF2  
328 and allelic loss from chromosome band 22q12 in malignant mesothelioma: Evidence for a  
329 two-hit mechanism of NF2 inactivation. *Genes Chromosom Cancer* **24**:238–242.  
330 doi:10.1002/(SICI)1098-2264(199903)24:3<238::AID-GCC9>3.0.CO;2-M
- 331 Chinthalapudi K, Mandati V, Zheng J, Sharff AJ, Bricogne G, Griffin PR, Kissil J, Izard T. 2018. Lipid  
332 binding promotes the open conformation and tumor-suppressive activity of  
333 neurofibromin 2. *Nat Commun* **9**:1338. doi:10.1038/s41467-018-03648-4
- 334 Cooper J, Giancotti FG. 2014. Molecular insights into NF2 /Merlin tumor suppressor function. *FEBS*  
335 *Letters* **588**:2743–2752. doi:10.1016/j.febslet.2014.04.001
- 336 Deng X, Fang L. 2018. VGLL4 is a transcriptional cofactor acting as a novel tumor suppressor via  
337 interacting with TEADs. *Am J Cancer Res* **8**:932–943.
- 338 Dey A, Varelas X, Guan K-L. 2020. Targeting the Hippo pathway in cancer, fibrosis, wound healing

- 339 and regenerative medicine. *Nat Rev Drug Discov* **19**:480–494. doi:10.1038/s41573-020-  
340 0070-z
- 341 Forrester MT, Hess DT, Thompson JW, Hultman R, Moseley MA, Stamler JS, Casey PJ. 2011. Site-  
342 specific analysis of protein S-acylation by resin-assisted capture. *J Lipid Res* **52**:393–398.  
343 doi:10.1194/jlr.D011106
- 344 Gupta MP, Kogut P, Gupta M. 2000. Protein kinase-A dependent phosphorylation of transcription  
345 enhancer factor-1 represses its DNA-binding activity but enhances its gene activation  
346 ability. *Nucleic Acids Res* **28**:3168–3177. doi:10.1093/nar/28.16.3168
- 347 Harvey KF, Pflieger CM, Hariharan IK. 2003. The Drosophila Mst ortholog, hippo, restricts growth  
348 and cell proliferation and promotes apoptosis. *Cell* **114**:457–467. doi:10.1016/s0092-  
349 8674(03)00557-9
- 350 He L, Yuan L, Sun Y, Wang P, Zhang H, Feng X, Wang Z, Zhang W, Yang C, Zeng YA, Zhao Y, Chen C,  
351 Zhang L. 2019. Glucocorticoid Receptor Signaling Activates TEAD4 to Promote Breast  
352 Cancer Progression. *Cancer Res* **79**:4399–4411. doi:10.1158/0008-5472.CAN-19-0012
- 353 Hong AW, Meng Z, Plouffe SW, Lin Z, Zhang M, Guan K-L. 2020. Critical roles of phosphoinositides  
354 and NF2 in Hippo pathway regulation. *Genes Dev* **34**:511–525.  
355 doi:10.1101/gad.333435.119
- 356 Huang J, Wu S, Barrera J, Matthews K, Pan D. 2005. The Hippo Signaling Pathway Coordinately  
357 Regulates Cell Proliferation and Apoptosis by Inactivating Yorkie, the Drosophila Homolog  
358 of YAP. *Cell* **122**:421–434. doi:10.1016/j.cell.2005.06.007
- 359 Huh H, Kim D, Jeong H-S, Park H. 2019. Regulation of TEAD Transcription Factors in Cancer Biology.  
360 *Cells* **8**:600. doi:10.3390/cells8060600
- 361 Jiang SW, Dong M, Trujillo MA, Miller LJ, Eberhardt NL. 2001. DNA binding of TEA/ATTS domain  
362 factors is regulated by protein kinase C phosphorylation in human choriocarcinoma cells.  
363 *J Biol Chem* **276**:23464–23470. doi:10.1074/jbc.M010934200
- 364 Jiao S, Li C, Hao Q, Miao H, Zhang L, Li L, Zhou Z. 2017. VGLL4 targets a TCF4–TEAD4 complex to  
365 coregulate Wnt and Hippo signalling in colorectal cancer. *Nat Commun* **8**:14058.  
366 doi:10.1038/ncomms14058
- 367 Jiao S, Wang H, Shi Z, Dong A, Zhang W, Song X, He F, Wang Y, Zhang Z, Wang W, Wang X, Guo T, Li  
368 P, Zhao Y, Ji H, Zhang L, Zhou Z. 2014. A Peptide Mimicking VGLL4 Function Acts as a YAP  
369 Antagonist Therapy against Gastric Cancer. *Cancer Cell* **25**:166–180.  
370 doi:10.1016/j.ccr.2014.01.010
- 371 Kalamarides M. 2002. Nf2 gene inactivation in arachnoidal cells is rate-limiting for meningioma  
372 development in the mouse. *Genes & Development* **16**:1060–1065.  
373 doi:10.1101/gad.226302
- 374 Kim N-G, Gumbiner BM. 2019. Cell contact and Nf2/Merlin-dependent regulation of TEAD  
375 palmitoylation and activity. *Proc Natl Acad Sci USA* **116**:9877–9882.  
376 doi:10.1073/pnas.1819400116
- 377 Li W, You L, Cooper J, Schiavon G, Pepe-Caprio A, Zhou L, Ishii R, Giovannini M, Hanemann CO, Long  
378 SB, Erdjument-Bromage H, Zhou P, Tempst P, Giancotti FG. 2010. Merlin/NF2 Suppresses  
379 Tumorigenesis by Inhibiting the E3 Ubiquitin Ligase CRL4DCAF1 in the Nucleus. *Cell*  
380 **140**:477–490. doi:10.1016/j.cell.2010.01.029
- 381 Li Y, Zhou H, Li F, Chan SW, Lin Z, Wei Z, Yang Z, Guo F, Lim CJ, Xing W, Shen Y, Hong W, Long J, Zhang  
382 M. 2015. Angiotensin binding-induced activation of Merlin/NF2 in the Hippo pathway. *Cell*



- 383 *Res* **25**:801–817. doi:10.1038/cr.2015.69
- 384 Lin KC, Moroishi T, Meng Z, Jeong H-S, Plouffe SW, Sekido Y, Han J, Park HW, Guan K-L. 2017.  
385 Regulation of Hippo pathway transcription factor TEAD by p38 MAPK-induced cytoplasmic  
386 translocation. *Nat Cell Biol* **19**:996–1002. doi:10.1038/ncb3581
- 387 Liu X, Li H, Rajurkar M, Li Q, Cotton JL, Ou J, Zhu LJ, Goel HL, Mercurio AM, Park J-S, Davis RJ, Mao  
388 J. 2016. Tead and AP1 Coordinate Transcription and Motility. *Cell Reports* **14**:1169–1180.  
389 doi:10.1016/j.celrep.2015.12.104
- 390 Meng Z, Moroishi T, Guan K-L. 2016. Mechanisms of Hippo pathway regulation. *Genes Dev* **30**:1–  
391 17. doi:10.1101/gad.274027.115
- 392 Mesrouze Y, Meyerhofer M, Bokhovchuk F, Fontana P, Zimmermann C, Martin T, Delaunay C, Izaac  
393 A, Kallen J, Schmelzle T, Erdmann D, Chène P. 2017. Effect of the acylation of TEAD4 on its  
394 interaction with co-activators YAP and TAZ: TEAD Acylation. *Protein Science* **26**:2399–2409.  
395 doi:10.1002/pro.3312
- 396 Morrison H, Sherman LS, Legg J, Banine F, Isacke C, Haipek CA, Gutmann DH, Ponta H, Herrlich P.  
397 2001. The NF2 tumor suppressor gene product, merlin, mediates contact inhibition of  
398 growth through interactions with CD44. *Genes Dev* **15**:968–980. doi:10.1101/gad.189601
- 399 Noland CL, Gierke S, Schnier PD, Murray J, Sandoval WN, Sagolla M, Dey A, Hannoush RN,  
400 Fairbrother WJ, Cunningham CN. 2016. Palmitoylation of TEAD Transcription Factors Is  
401 Required for Their Stability and Function in Hippo Pathway Signaling. *Structure* **24**:179–  
402 186. doi:10.1016/j.str.2015.11.005
- 403 Okada T, Lopez-Lago M, Giancotti FG. 2005. Merlin/NF-2 mediates contact inhibition of growth by  
404 suppressing recruitment of Rac to the plasma membrane. *J Cell Biol* **171**:361–371.  
405 doi:10.1083/jcb.200503165
- 406 Ota M, Sasaki H. 2008. Mammalian Tead proteins regulate cell proliferation and contact inhibition  
407 as transcriptional mediators of Hippo signaling. *Development* **135**:4059–4069.  
408 doi:10.1242/dev.027151
- 409 Pan D. 2010. The hippo signaling pathway in development and cancer. *Dev Cell* **19**:491–505.  
410 doi:10.1016/j.devcel.2010.09.011
- 411 Pobbati AV, Han X, Hung AW, Weiguang S, Huda N, Chen G-Y, Kang C, Chia CSB, Luo X, Hong W,  
412 Poulsen A. 2015. Targeting the Central Pocket in Human Transcription Factor TEAD as a  
413 Potential Cancer Therapeutic Strategy. *Structure* **23**:2076–2086.  
414 doi:10.1016/j.str.2015.09.009
- 415 Sher I, Hanemann CO, Karplus PA, Bretscher A. 2012. The tumor suppressor merlin controls growth  
416 in its open state and is converted by phosphorylation to a less-active more-closed state.  
417 *Developmental cell* **22**:703. doi:10.1016/j.devcel.2012.03.008
- 418 Wu S, Huang J, Dong J, Pan D. 2003. hippo Encodes a Ste-20 Family Protein Kinase that Restricts  
419 Cell Proliferation and Promotes Apoptosis in Conjunction with salvador and warts. *Cell*  
420 **114**:445–456. doi:10.1016/S0092-8674(03)00549-X
- 421 Yin F, Yu J, Zheng Y, Chen Q, Zhang N, Pan D. 2013. Spatial Organization of Hippo Signaling at the  
422 Plasma Membrane Mediated by the Tumor Suppressor Merlin/NF2. *Cell* **154**:1342–1355.  
423 doi:10.1016/j.cell.2013.08.025
- 424 Yu F-X, Zhao B, Guan K-L. 2015. Hippo Pathway in Organ Size Control, Tissue Homeostasis, and  
425 Cancer. *Cell* **163**:811–828. doi:10.1016/j.cell.2015.10.044
- 426 Zehir A, Benayed R, Shah RH, Syed A, Middha S, Kim HR, Srinivasan P, Gao J, Chakravarty D, Devlin

427 SM, Hellmann MD, Barron DA, Schram AM, Hameed M, Dogan S, Ross DS, Hechtman JF,  
428 DeLair DF, Yao J, Mandelker DL, Cheng DT, Chandramohan R, Mohanty AS, Ptashkin RN,  
429 Jayakumaran G, Prasad M, Syed MH, Rema AB, Liu ZY, Nafa K, Borsu L, Sadowska J,  
430 Casanova J, Bacares R, Kiecka IJ, Razumova A, Son JB, Stewart L, Baldi T, Mullaney KA, Al-  
431 Ahmadie H, Vakiani E, Abeshouse AA, Penson AV, Jonsson P, Camacho N, Chang MT, Won  
432 HH, Gross BE, Kundra R, Heins ZJ, Chen H-W, Phillips S, Zhang H, Wang J, Ochoa A, Wills J,  
433 Eubank M, Thomas SB, Gardos SM, Reales DN, Galle J, Durany R, Cambria R, Abida W,  
434 Cercek A, Feldman DR, Gounder MM, Hakimi AA, Harding JJ, Iyer G, Janjigian YY, Jordan EJ,  
435 Kelly CM, Lowery MA, Morris LGT, Omuro AM, Raj N, Razavi P, Shoushtari AN, Shukla N,  
436 Soumerai TE, Varghese AM, Yaeger R, Coleman J, Bochner B, Riely GJ, Saltz LB, Scher HI,  
437 Sabbatini PJ, Robson ME, Klimstra DS, Taylor BS, Baselga J, Schultz N, Hyman DM, Arcila  
438 ME, Solit DB, Ladanyi M, Berger MF. 2017. Mutational landscape of metastatic cancer  
439 revealed from prospective clinical sequencing of 10,000 patients. *Nat Med* **23**:703–713.  
440 doi:10.1038/nm.4333

441 Zhang L, Ren F, Zhang Q, Chen Y, Wang B, Jiang J. 2008. The TEAD/TEF family of transcription factor  
442 Scalloped mediates Hippo signaling in organ size control. *Dev Cell* **14**:377–387.  
443 doi:10.1016/j.devcel.2008.01.006

444 Zhang W, Gao Y, Li P, Shi Z, Guo T, Li Fei, Han X, Feng Y, Zheng C, Wang Z, Li Fuming, Chen H, Zhou  
445 Z, Zhang L, Ji H. 2014. VGLL4 functions as a new tumor suppressor in lung cancer by  
446 negatively regulating the YAP-TEAD transcriptional complex. *Cell Res* **24**:331–343.  
447 doi:10.1038/cr.2014.10

448 Zhao B, Li L, Lei Q, Guan K-L. 2010a. The Hippo-YAP pathway in organ size control and tumorigenesis:  
449 an updated version. *Genes Dev* **24**:862–874. doi:10.1101/gad.1909210

450 Zhao B, Li L, Tumaneng K, Wang C-Y, Guan K-L. 2010b. A coordinated phosphorylation by Lats and  
451 CK1 regulates YAP stability through SCF(beta-TRCP). *Genes Dev* **24**:72–85.  
452 doi:10.1101/gad.1843810

453 Zhao B, Ye X, Yu J, Li L, Li W, Li S, Yu J, Lin JD, Wang C-Y, Chinnaiyan AM, Lai Z-C, Guan K-L. 2008.  
454 TEAD mediates YAP-dependent gene induction and growth control. *Genes & Development*  
455 **22**:1962–1971. doi:10.1101/gad.1664408

456 Zheng B, Zhu S, Wu X. 2015. Clickable analogue of cerulenin as chemical probe to explore protein  
457 palmitoylation. *ACS Chem Biol* **10**:115–121. doi:10.1021/cb500758s

458 Zheng Y, Pan D. 2019. The Hippo Signaling Pathway in Development and Disease. *Developmental*  
459 *Cell* **50**:264–282. doi:10.1016/j.devcel.2019.06.003

460

## 461 **Materials and methods**

### 462 **Protein purification**

463 Human TEAD4 YBD domain (217-434) was cloned into a PET-28a vector with an N-  
464 terminal SUMO and 6 ×His tag and a PGEX-6P-1 vector with an N-terminal GST tag,  
465 respectively. SUMO-tagged and GST-tagged TEAD4-YBD were expressed in *Escherichia*

466 *coli* BL21 (DE3) cells and purified using the Ni<sup>2+</sup>-NTA agarose resin (GE Healthcare) or  
467 GST agarose resin (GE Healthcare), and purified via size-exclusion chromatography using  
468 a Superdex 200 column (GE Healthcare). Purified SUMO-TEAD4 and GST-TEAD4 were  
469 concentrated to 2 mg/mL in a buffer containing 20 mM Tris (pH 8.0), 150 mM NaCl, and 1  
470 mM DTT.

471 For TEAD4-YBD alone, GST-TEAD4-YBD was purified using GST agarose resin (GE  
472 Healthcare). GST tag was removed with 3C protease overnight at 4 °C. The resin was  
473 collected using the tag-free with 3C protease overnight at 4°C. The eluted TEAD4-  
474 YBD protein was purified via size-exclusion chromatography using a Superdex 200 column  
475 (GE Healthcare). Purified TEAD4-YBD was concentrated to 2 mg/mL in a buffer containing  
476 20 mM Tris (pH 8.0), 150 mM NaCl, and 1 mM DTT.

477 NF2(18-595) was cloned into a PMAL-3C vector with an N-terminal MBP tag. MBP-NF2  
478 was purified using amylose resin (New England Biolabs) and eluted using 10mM maltose  
479 (BioFroxx). MBP-NF2 was purified via size exclusion chromatography using a Superdex  
480 200 column (GE Healthcare) in a buffer containing 20 mM Tris pH 8.0, 150 mM NaCl, and  
481 1 mM DTT. Human CHIP and Hsp70 were cloned into a PET-28a vector with an N-terminal  
482 SUMO tag. SUMO-CHIP and SUMO-Hsp70 were purified using the Ni<sup>2+</sup>-NTA agarose  
483 resin (GE Healthcare) and eluted with 200mM imidazole (Sigma-Aldrich). The proteins  
484 were then purified with a Superdex 200 column (GE Healthcare) in a buffer containing 20  
485 mM Tris (pH 8.0), 150 mM NaCl, and 1 mM DTT.

#### 486 **Cell culture and transfection**

487 HEK293T, HEK293A, HeLa, and MCF-10A cells were cultured in DMEM medium (Gibco)

488 supplemented with 10% fetal bovine serum (FBS, Gibco) and 1% penicillin/streptomycin.  
489 NCI-H226 cells were cultured in the Roswell Park Memorial Institute-1640 medium (Gibco)  
490 supplemented with 10% FBS (Gibco) and 1% penicillin/streptomycin. Plasmids were  
491 transfected using the HighGene Transfection Reagent (ABclonal). HeLa cells were  
492 transfected using Lipofectamine 2000 (Invitrogen). The sequences of siRNAs used in this  
493 study are as follows:

*siNF2-1*: CCGUGAGGAUCGUCACCAUTT

*siNF2-2*: GGUACUGGAUCAUGAUGUUTT

*siNF2-3*: GGAAUGAAAUCCGAAACAUTT

#### 494 **Protein immunoprecipitation**

495 HEK293T cells were transiently transfected with Myc-NF2 and Flag-TEAD4. The cells were  
496 lysed in a lysis buffer (20 mM Tris 7.5, 150 mM NaCl, 1 mM EDTA, 1% Triton, and  
497 phosphatase inhibitor cocktail) for 30 min at 0°C. The supernatant was incubated with red  
498 anti-FLAG beads (Millipore) or Protein-A Magnetic beads (Bio-Rad) and Myc antibody  
499 (Cell Signaling Technology) overnight at 4°C. The proteins on the beads were subjected  
500 to SDS-PAGE and analyzed via western blotting.

#### 501 ***In vitro* protein-binding assay**

502 Recombinant GST-NF2 was bound to a GST resin (GE Healthcare), and MBP-NF2 was  
503 bound to an MBP resin (New England Biolabs) in PBS for 1 h at 4°C. After washing, the  
504 resin was incubated with purified SUMO-TEAD4 in PBS for 1h at 4°C and washed four  
505 times. Proteins retained on the beads were analyzed using SDS-PAGE and western  
506 blotting. SUMO-TEAD4 was detected using an antibody against 6 × His.

507 ***In vitro* palmitoylation assay**

508 Recombinant TEAD4 protein (500 ng) was incubated with 1 mM alkyne palmitoyl-CoA  
509 (Cayman Chemical) for 0.5 h in 20mM Tris 8.0 and 100mM NaCl. Click reaction with biotin-  
510 azide (Sigma-Aldrich) was performed for 1h at 25°C. The reactions were stopped using  
511 2XSDS sample buffer, followed by SDS-PAGE analysis. Biotinylated TEAD4 was detected  
512 using streptavidin-IRDye (LI-COR).

513 ***In vivo* palmitoylation assay**

514 Myc-NF2 was transfected into the cells and 48 h after transfection, the cells were collected  
515 and subjected to the CAPTUREome S-Palmitoylated Protein Kit (Badrilla). Briefly, the cells  
516 were lysed and blocked with the blocking buffer at 40°C for 4 h. The mixture was then  
517 subjected to ice-cold acetone precipitation. The precipitate was re-dissolved in the binding  
518 buffer and incubated with the thioester cleavage reagent and capture resin for 2 h. After  
519 washing, the capture resin was subjected to SDS-PAGE and analyzed via western blotting.

520 ***In vitro* ubiquitination assay**

521 Each *in vitro* ubiquitination reaction was performed using 0.5uM E1, 4uM UbcH5b, 2uM  
522 CHIP, 1uM Hsp70, 10uM ubiquitin, and 1uM recombinant GST-WT/2CS TEAD4 for 60 min  
523 at 37°C in 20mM Tris8.0, 100mM NaCl, 5mM ATP, 2.5mM MgCl<sub>2</sub>, and 1mM DTT.  
524 Ubiquitination reactions were stopped using 2XSDS sample buffer, followed by detection  
525 via western blotting with the GST antibody (ABclonal).

526 **Real-time PCR**

527 Total RNA was extracted using the TRIzol reagent (Invitrogen), and reverse transcription  
528 (RT) was performed using the iScript Reverse Transcription Supermix (Bio-Rad). Real-time

529 RT-PCR analysis was performed using SYBR Green Realtime PCR Master Mix (Toyobo)  
530 with the Applied Biosystems Step Two Real-Time PCR System (Applied Biosystems).  
531 GAPDH was used as a control. The standard comparative CT quantization method was  
532 used to analyze the RT-PCR results.  
533 Primers for RT-PCR are as following:

*TEAD1* F: ATGGAAAGGATGAGTGA CTCTGC

*TEAD1* R: TCCCACATGGTGGATAGATAGC

*TEAD2* F: CTTCGTGGAACCGCCAGAT

*TEAD2* R: GGAGGCCACCCTTTTTCTCA

*TEAD3* F: TCATCCTGTCAGZCGAGGG

*TEAD3* R: TCTTCCGAGCTAGAACCTGTATG

*TEAD4* F: GAACGGGGACCCTCCAATG

*TEAD4* R: GCGAGCATACTCTGTCTCAAC

*YAP* F: CACAGCATGTTCGAGCTCAT

*YAP* R: GATGCTGAGCTGTGGGTGTA

*NF2* F: TGCGAGATGAAGTGAAAGG

*NF2* R: GCCAAGAAGTGAAAGGTGAC

534 **BiFC assay**

535 Full-length YFP (1-238) was divided into two insertions: nYFP (1-154) and cYFP (155-238)  
536 in this study. pcDNA3.1-NF2/TEAD4/LATS vectors were receptors for C-terminal n/c-YFP  
537 fragments with HindIII and BamHIsites.HEK-293T cells plated in a 6-well plate for 24 h,  
538 and transfected with 800 ng nYFP- and 800 ng cYFP-tagged NF2/TEAD4、LATS constructs.

539 The cells were treated at low temperature (30 °C) for 6 h for fluorophore maturation, and  
540 after 48 h, fluorescence was determined via flow cytometry using BD FACS Calibur (BD  
541 Biosciences) or observed under a confocal laser scanning microscope (Olympus).

#### 542 **Immunofluorescent microscopy**

543 NF2 KO HEK293A cells on coverslips were transfected with Myc-NF2 WT or mutant for  
544 48h at 37°C. Cells were fixed in 4% paraformaldehyde (aladin) for 30 min followed by  
545 permeabilization with 0.1% TritonX-100 (aladin) for 30 mins. Cells were blocked in 3% BSA  
546 for 1 h and incubated overnight at 4°C in primary antibodies diluted in 3% BSA. Secondary  
547 antibodies were diluted in 3% BSA and incubated for 1 h. Then cells were stained with  
548 DAPI (Beyotime).

#### 549 **BrdU Incorporation assay**

550 WT and *NF2* KO HEK293A cells on coverslips were transfected with Myc-NF2 WT or  
551 mutant and after 36 h incubated with 10 uM BrdU (Beyotime) for 6 h at 37°C. Cells were  
552 fixed with 4% paraformaldehyde for 30 min and washed with PBS with 1% Triton X-100 for  
553 30 min. Then cells were incubated with 2N HCl for 30 min at room temperature. After  
554 washing with PBS, cells were blocked with PBS containing 1% Triton X-100 and 3% BSA.  
555 Cells were incubated with the primary antibodies against BrdU (ABCam) overnight at 4°C.  
556 and incubated with the Alexa Fluor 488 dye-conjugated secondary antibodies (Invitrogen)  
557 for 1 h in the dark and then stained with DAPI (Beyotime).

#### 558 **Cell counting kit-8 (CCK-8) assay**

559 Cells were seeded into 96-well plates and transfected with Myc-NF2 WT or mutant. After  
560 48 h, cell counting kit-8 (Biosharp) was used to detect cell viability. The cells in each well

561 were incubated with 10 ul CCK-8 solution at 37°C for 1 h. The absorbance at 450 nm was

562 detected using a plate reader.

563



564 **Figure Legends**

**Figure 1**

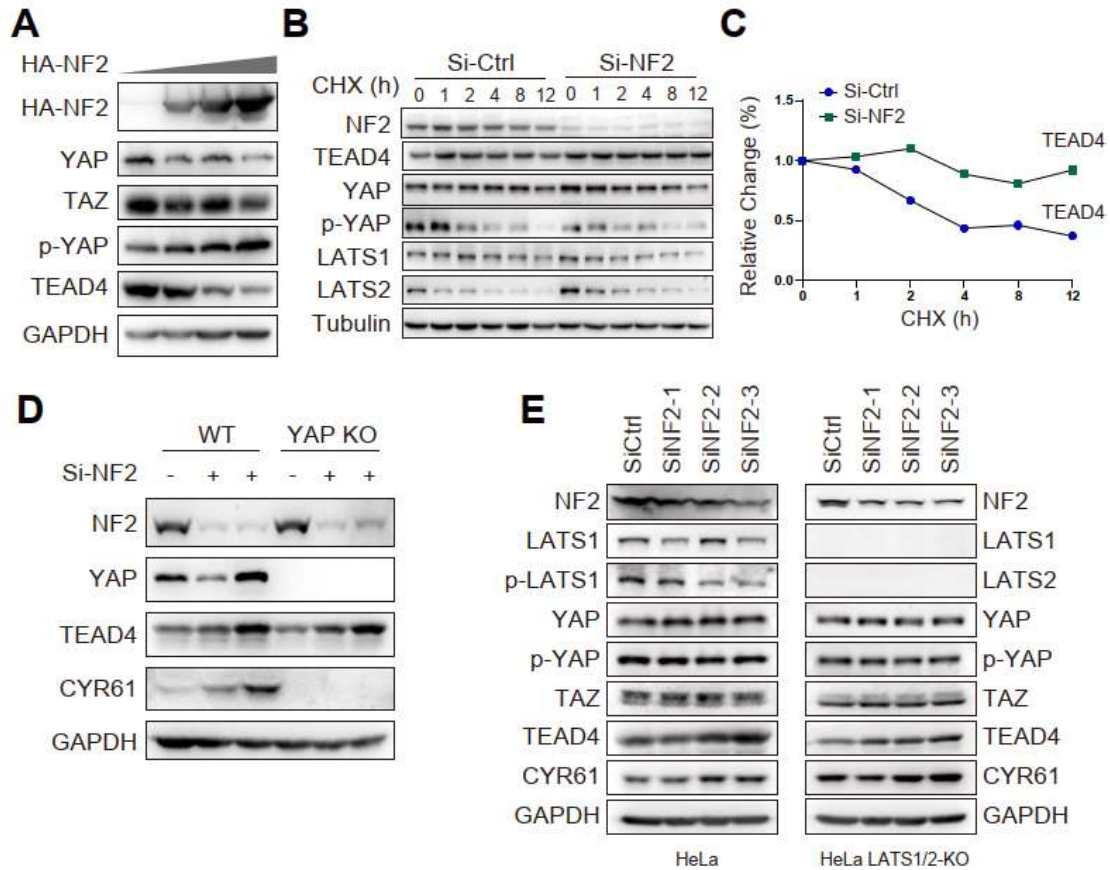

565

566 **Figure 1. NF2 decreases the protein levels of TEADs independently of LATS1/2 and**

567 **YAP**

568 **(A)** Protein levels of TEAD4, YAP and TAZ were determined via western blotting in

569 HEK293T cells with overexpression of HA-NF2.

570 **(B)** MCF-10A cells were transfected with the control siRNA or NF2 siRNA. Then, 100 ug/mL

571 of cycloheximide (CHX) was added and the cells were harvested at the indicated time

572 points. Protein levels of endogenous TEAD4, YAP, p-YAP, and LATS-1/2 were determined

573 via western blotting.

574 (C) Quantitative analysis of TEAD4 protein level in (B).

575 (D) Wild-type (WT) and *YAP* knockout (KO) HeLa cells were transfected with or without the  
576 NF2 siRNA. Protein levels of TEAD4, YAP, and CYR61 were determined via western  
577 blotting.

578 (E) WT and *LATS1/2* KO HeLa cells were transfected with the control siRNA or NF2 siRNA.  
579 Protein levels of TEAD4, YAP/TAZ, LATS1, and CYR61 were determined by western  
580 blotting.

581 **Figure 1-source data 1.** Whole uncropped blots represented in *Figure 1A*. NF2, YAP, TAZ,  
582 p-YAP, TEAD4 and GAPDH protein levels in HEK293T cells.

583 **Figure 1-source data 2.** Whole uncropped blots represented in *Figure 1B*. NF2, YAP, p-  
584 YAP, TEAD4, Lats1, Lats2 and Tubulin protein levels in MCF-10A cells.

585 **Figure 1-source data 3.** Whole uncropped blots represented in *Figure 1D*. NF2, TEAD4,  
586 YAP, CYR61 and GAPDH protein levels in Wild-type (WT) and *YAP* knockout (KO) HeLa  
587 cells.

588 **Figure 1-source data 4.** Whole uncropped blots represented in *Figure 1E*. NF2, Lats1,  
589 Lats2, p-Lats1, TEAD4, YAP, p-YAP, TAZ, CYR61 and GAPDH protein levels in Wild-type  
590 (WT) and *LATS1/2* knockout (KO) HeLa cells.

591



601 the FERM domain enhanced the interaction between TEAD4 and NF2 C-terminal  
602 fragments. Quantitative analysis of relative protein binding activity of NF2 to TEAD4 was  
603 shown in the right panel. Mean  $\pm$  s.e.m, N = 3.

604 **(D)** *In vitro* pull-down assay of MBP-NF2 WT and A585W mutant with His-TEAD4-YBD to  
605 assess the interaction between TEAD4 and NF2. CBB, Coomassie brilliant blue.  
606 Quantitative analysis of relative protein binding activity of NF2 to TEAD4 was shown in the  
607 right panel. Mean  $\pm$  s.e.m, N = 3.

608 **(E)** A cartoon model of NF2 binding to TEAD4 through FERM domain and C-terminal tail.

609 **Figure 2-source data 1.** Whole SDS-PAGE images and uncropped blots represented in  
610 **Figure 2A.** TEAD4-YBD<sub>His</sub>, GST-NF2-FL, GST-NF2 1-341, GST-NF2 342-595 protein  
611 levels in GST pull-down assay.

612 **Figure 2-source data 2.** Whole uncropped blots represented in **Figure 2B.** Flag-TEAD4  
613 and Myc-NF2 protein levels with Co-immunoprecipitation assay in HEK293T cells.

614 **Figure 2-source data 3.** Whole uncropped blots represented in **Figure 2C.** TEAD4-YBD<sub>His</sub>,  
615 NF2 FERM<sub>His</sub> protein levels in GST pull-down assay.

616 **Figure 2-source data 4.** Whole SDS-PAGE images and uncropped blots represented in  
617 **Figure 2D.** TEAD4-YBD<sub>His</sub> and MBP-NF2 protein levels in MBP pull-down assay.

618

619

## Figure 3

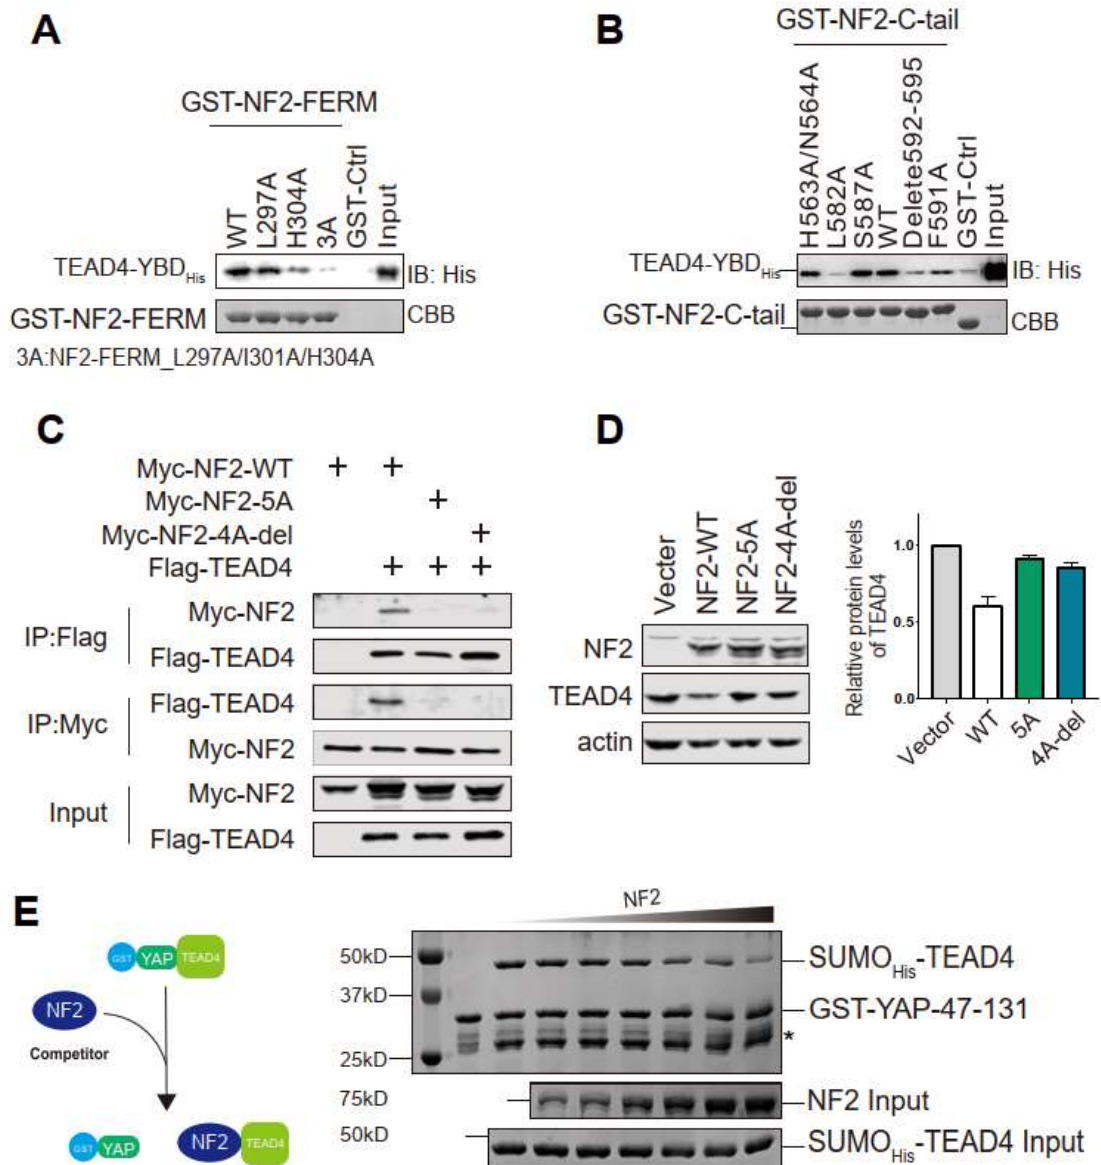

620

621 **Figure 3. NF2 decreases TEAD4 protein level via direct interaction**

622 (A) GST pull-down assay of GST-NF2-FERM WT and mutants with His-TEAD4-YBD was  
623 performed to assess the interaction between TEAD4 and NF2-FERM.

624 (B) GST pull-down assay of GST-NF2-507-595 WT and mutants with His-TEAD4-YBD was

625 performed to assess the interaction between TEAD4 and NF2 C-terminal tail.

626 (C) Co-immunoprecipitation experiment of Myc-tagged NF2 WT and mutants with Flag-  
627 tagged TEAD4 was performed in HEK293T cells. Cell lysates were treated to anti-Flag or  
628 anti-Myc beads and immunoblotted with indicated antibodies.

629 (D) TEAD4 Protein levels in NCI-H226 cells overexpressing Myc-tagged NF2 WT or  
630 mutants were determined via western blotting by indicated antibody. Quantitative analysis  
631 of relative protein levels of TEAD4 was shown in the right panel. Mean  $\pm$  s.e.m, N = 3.

632 (E) Competitive binding assay was performed to detect the binding effect of YAP-TEAD4  
633 complex with a dose addition of NF2.

634 **Figure 3-source data 1.** Whole SDS-PAGE images and uncropped blots represented in  
635 *Figure 3A*. TEAD4-YBD<sub>His</sub> and GST-NF2 FERM protein levels in GST pull-down assay.

636 **Figure 3-source data 2.** Whole SDS-PAGE images and uncropped blots represented in  
637 *Figure 3B*. TEAD4-YBD<sub>His</sub> and GST-NF2 507-595 protein levels in GST pull-down assay.

638 **Figure 3-source data 3.** Whole uncropped blots represented in *Figure 3C*. Flag-TEAD4  
639 and Myc-NF2 protein levels with Co-immunoprecipitation assay in HEK293T cells.

640 **Figure 3-source data 4.** Whole uncropped blots represented in *Figure 3D*. TEAD4, Myc-  
641 NF2 and beta-actin protein levels in NCI-H226 cells.

642 **Figure 3-source data 5.** Whole SDS-PAGE images represented in *Figure 3E*. TEAD4-  
643 YBD<sub>His</sub>, GST-YAP 47-131 and NF2 protein levels in Competitive binding assay.

644

## Figure 4

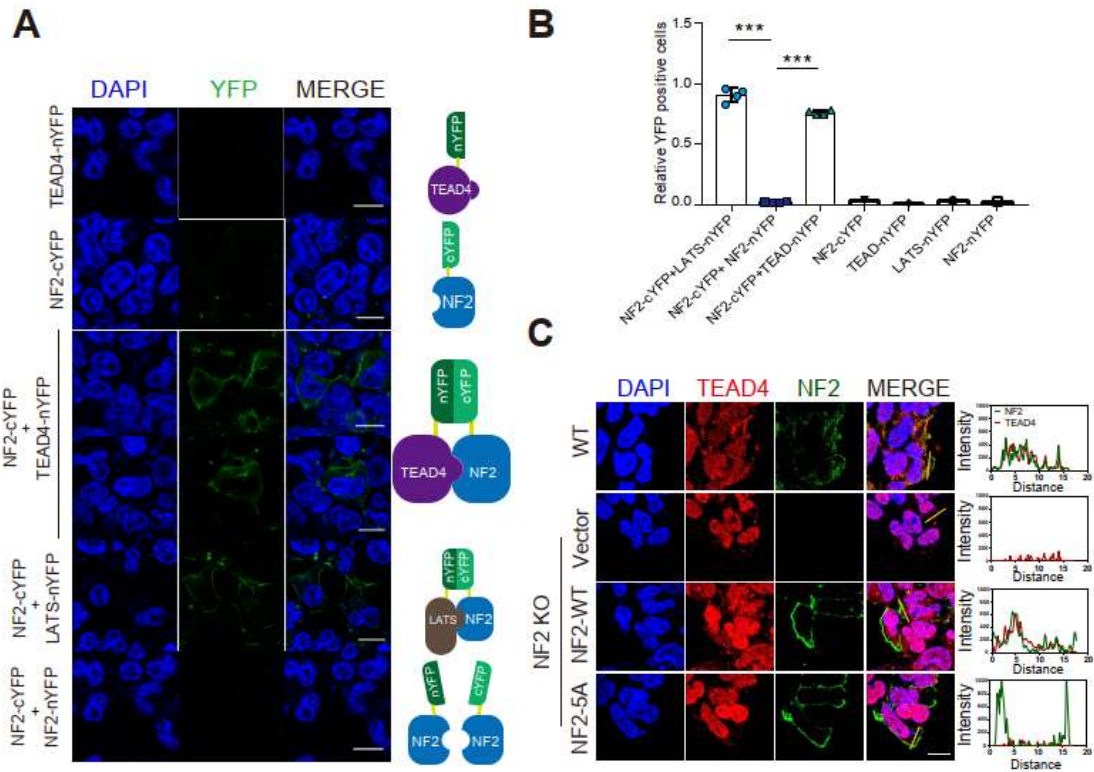

645

646 **Figure 4. NF2 induces the cytoplasmic retention of TEAD4 via interaction**

647 **(A)** BiFC assays were performed to detect the location of the NF2-TEAD4 complex.

648 HEK293T cells were transfected with TEAD4-nYFP, NF2-cYFP, NF2-cYFP and TEAD4-

649 nYFP, NF2-cYFP and Lats-nYFP, and NF2-cYFP and NF2-nYFP. The fluorescence signals

650 of intact YFP were detected. Representative images are shown here. Scale bar = 10  $\mu$ m.

651 **(B)** Quantification of flow cytometry from BiFC assay (A). Mean  $\pm$  s.e.m. \*\*\* $P$  < 0.001.

652 **(C)** NF2 induces the cytoplasmic translocation of TEAD4. Immunofluorescence of

653 endogenous TEAD4 was detected in *NF2-KO* HEK293A cells with expression of Myc-NF2

654 WT and mutant. Scale bar = 10 $\mu$ m.

655 **Figure 4-source data 1.** Source data for quantifications graphed in *Figure 4B*.

656

## Figure 5

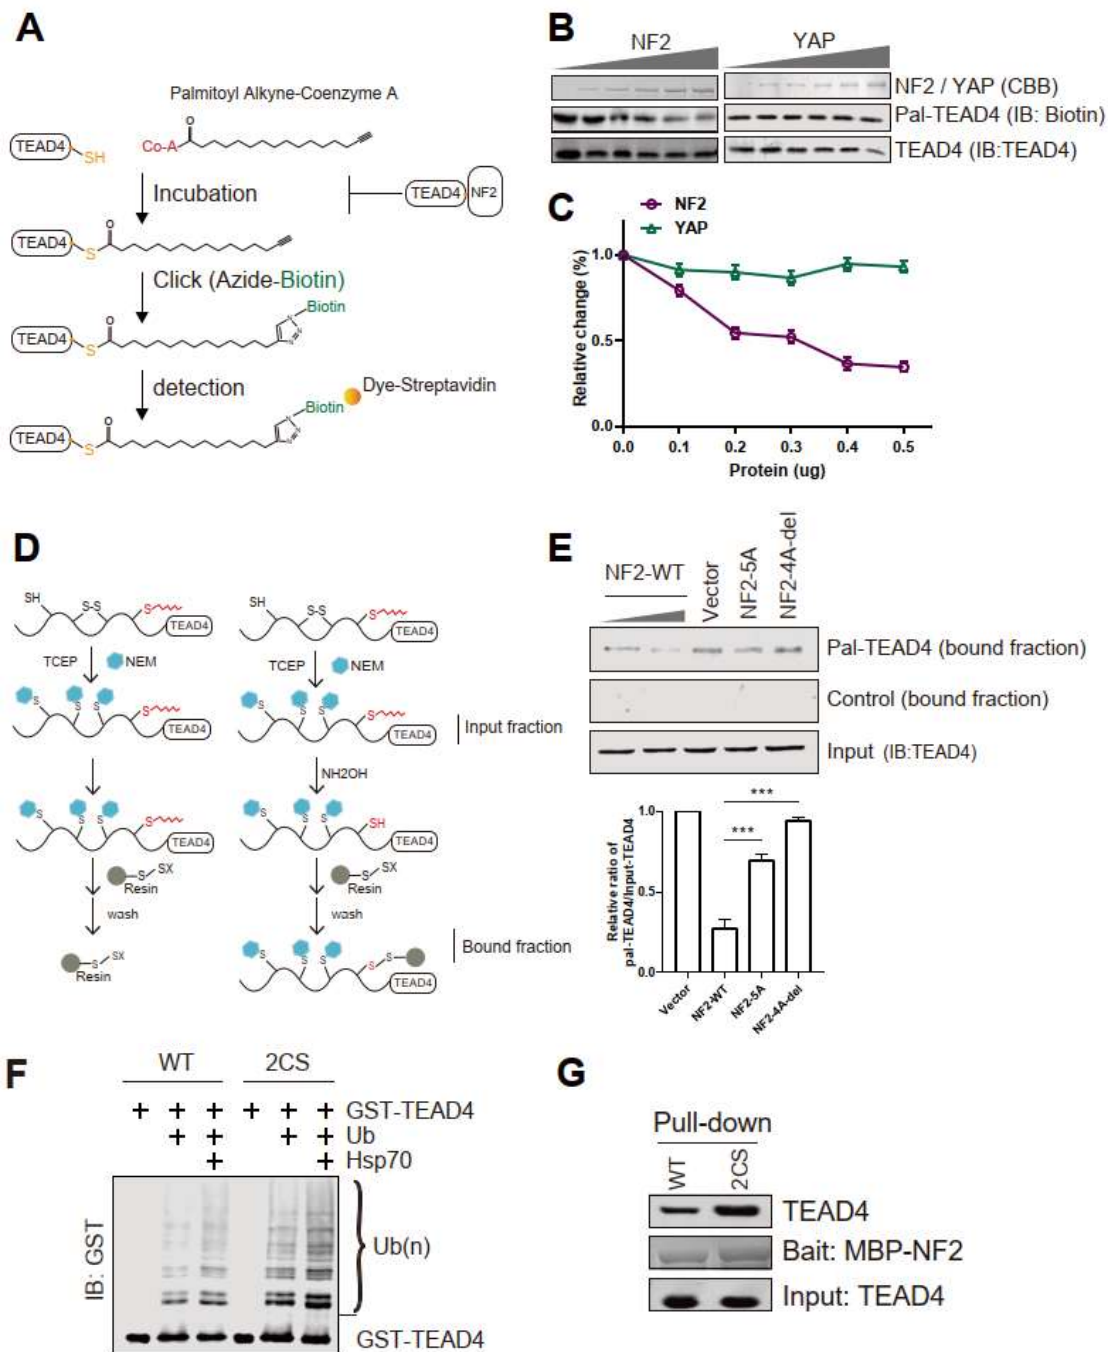

657

658 **Figure 5. NF2 inhibits TEAD4 palmitoylation via direct interaction.**

659 **(A)** Schematic model of the *in vitro* auto-palmitoylation assay of recombinant TEAD4.

660 **(B)** *In vitro* auto-palmitoylation assay of recombinant TEAD4 incubated with NF2 or YAP



661 was performed under protocols. Palmitoylation levels were detected via streptavidin  
662 blotting.

663 **(C)** Quantitative analysis of palmitoylated TEAD4 (Pal-TEAD4) panels in (B).

664 **(D)** Schematic model of the *in vivo* palmitoylation assay with acyl resin-assisted capture  
665 methods in cells.

666 **(E)** *In vivo* palmitoylation assay to detect the palmitoylation levels of endogenous TEAD4  
667 in NCI-H226 cells expressing the Myc-NF2 WT and mutants. palmitoylation levels of  
668 TEAD4 were determined via western and streptavidin blotting. Quantitative analysis of  
669 palmitoylated TEAD4 (Pal-TEAD4) was shown in the down panel. Mean  $\pm$  s.e.m, N = 3,  
670 \*\*\* $P < 0.001$ .

671 **(F)** *In vitro* ubiquitination assay was performed with purified recombinant E1, UbcH5b as  
672 the E2 ubiquitin-conjugating enzyme, and E3 ligase CHIP to detect the ubiquitination level  
673 of TEAD4 WT and 2CS.

674 **(G)** *In vitro* pull-down assay of MBP-NF2 with TEAD4 WT and 2CS. CBB, Coomassie  
675 brilliant blue.

676 **Figure 5-source data 1.** Whole SDS-PAGE images and uncropped blots represented in  
677 **Figure 5B.** Pal-TEAD4-YBD<sub>His</sub>, TEAD4-YBD<sub>His</sub>, MBP-NF2 FL and YAP FL protein levels in  
678 *In vitro* auto-palmitoylation assay.

679 **Figure 5-source data 2.** Whole uncropped blots represented in **Figure 5E.** Pal-TEAD4  
680 and TEAD4 protein levels in NCI-H226 cells.

681 **Figure 5-source data 3.** Whole uncropped blots represented in **Figure 5F.** Ubiquitination  
682 levels of GST-TEAD4 in *In vitro* ubiquitination assay.

683 **Figure 5-source data 4.** Whole SDS-PAGE images and uncropped blots represented in  
684 **Figure 5G.** TEAD4-YBD<sub>His</sub> and MBP-NF2 FL protein levels in MBP pull-down assay.

## Figure 6

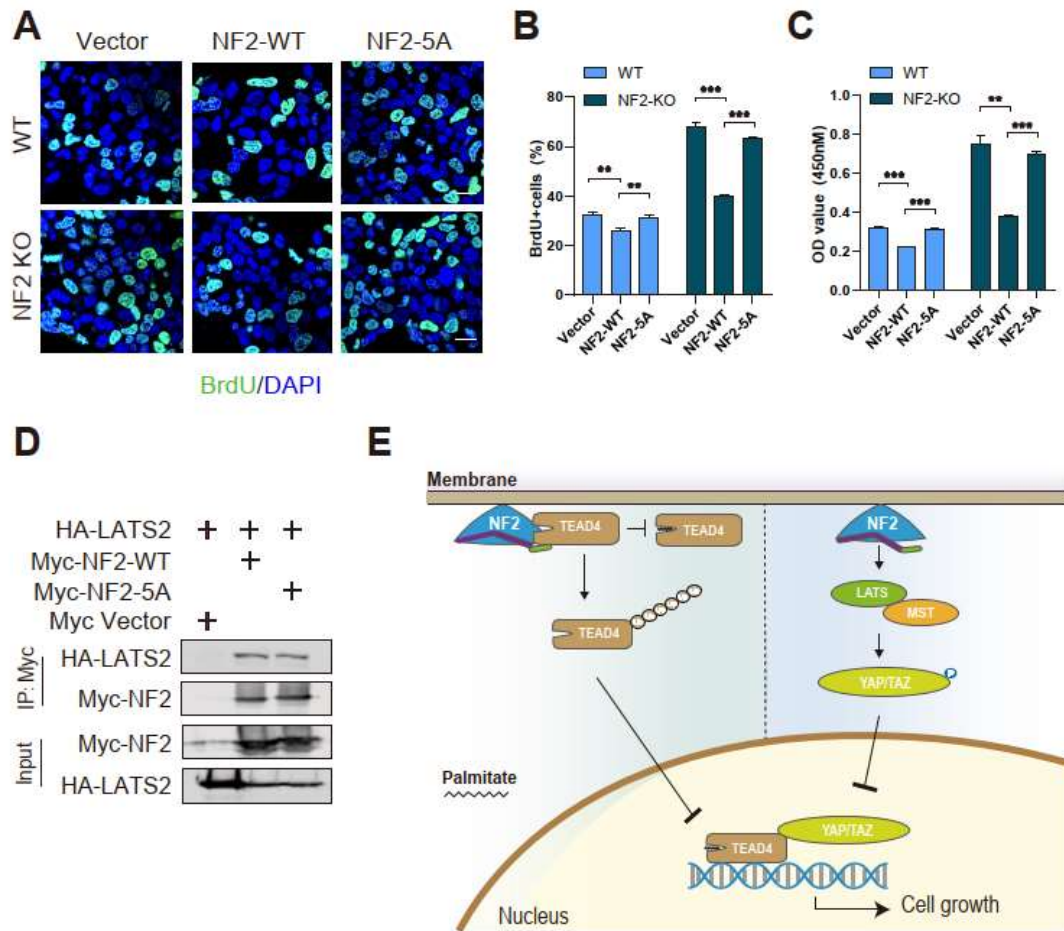

685

686 **Figure 6. TEAD4 interaction is required for NF2 function to suppress tumor cell**  
 687 **proliferation.**

688 (A) WT and *NF2* KO HEK293A cells transfected with vector or the NF2-WT/5A were  
 689 subjected to BrdU incorporation assay. Scale bar = 20  $\mu$ m.

690 (B) The percentage of BrdU-positive cells from (A) was quantified. Mean  $\pm$  s.e.m, N = 3,  
 691 \*\* $P$  < 0.01, \*\*\* $P$  < 0.001.

692 (C) WT and *NF2* KO HEK293A cells transfected with vector or the NF2-WT/5A were  
 693 subjected to cell counting kit-8 (CCK-8), and OD 450nm were quantified. Mean  $\pm$

694 s.e.m.\*\* $P < 0.01$ , \*\*\* $P < 0.001$ .

695 **(D)** Co-immunoprecipitation experiment of Myc-tagged NF2 WT and mutants with HA-  
696 tagged LATS2 was performed in *NF2* KO HEK293A cells. Cell lysates were treated to anti-  
697 Myc beads and immunoblotted with indicated antibodies.

698 **(E)** The working model for the molecular mechanism of NF2 function to suppress tumor  
699 cell proliferation through LATS1/2 (right) and directly through TEAD4 (left). The  
700 straightforward mechanism, which NF2 directly binds to and down-regulates TEAD4  
701 activity, could complement the classical regulation through Hippo pathway.

702 **Figure 6-source data 1.** Source data for quantifications graphed in *Figure 6B*.

703 **Figure 6-source data 2.** Source data for quantifications graphed in *Figure 6C*.

704 **Figure 6-source data 3.** Whole uncropped blots represented in *Figure 6D*. HA-Lats and  
705 Myc-NF2 protein levels with Co-immunoprecipitation assay in *NF2* KO HEK293A cells.

## Supplemental material

### Figure S1

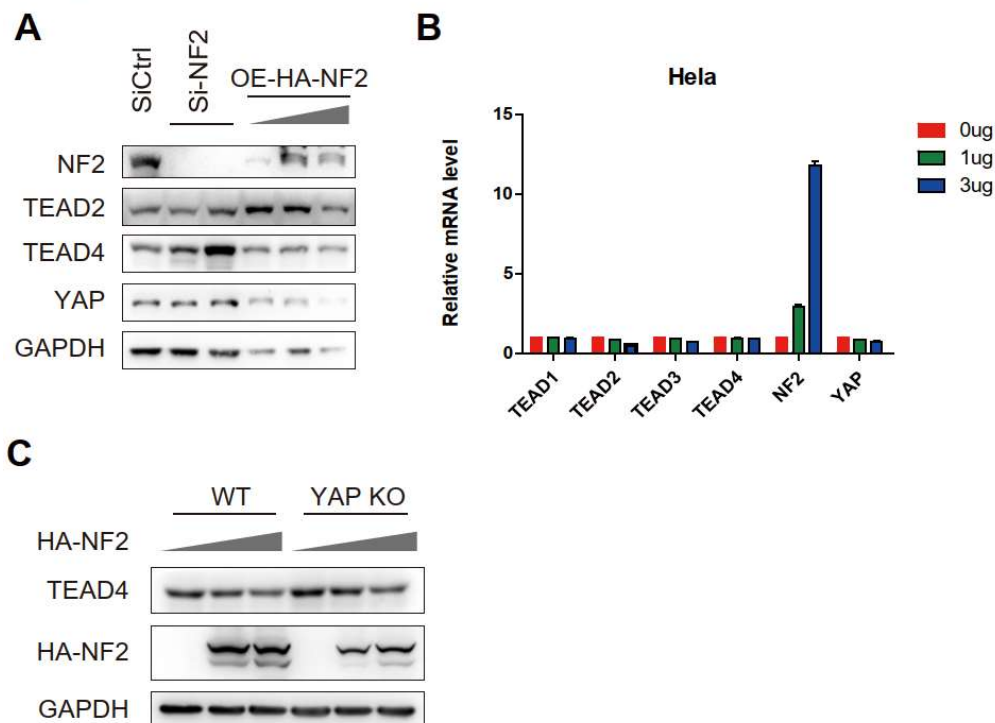

**Figure supplement 1.** NF2 decreases the protein levels of TEADs.

(A) Protein levels of TEAD2/4 and YAP were determined by western blotting in MCF-10A cells with overexpression of HA-NF2 or siNF2 treatment.

(B) RT-PCR analysis of TEAD1/2/3/4 and YAP mRNA levels were performed in HeLa cells with overexpression of NF2.

(C) Protein level of TEAD4 was determined by western blotting in WT or YAP-KO HEK293T cells with overexpression of HA-NF2.

**Figure supplement 1-source data 1.** Whole uncropped blots represented in *Figure supplement 1A*. NF2, TEAD2, TEAD4, YAP and GAPDH protein levels in MCF-10A cells.

**Figure supplement 1-source data 2.** Whole uncropped blots represented in *Figure supplement 1C*. NF2, TEAD4 and GAPDH protein levels in WT or YAP-KO HEK293T cells.

## Figure S2

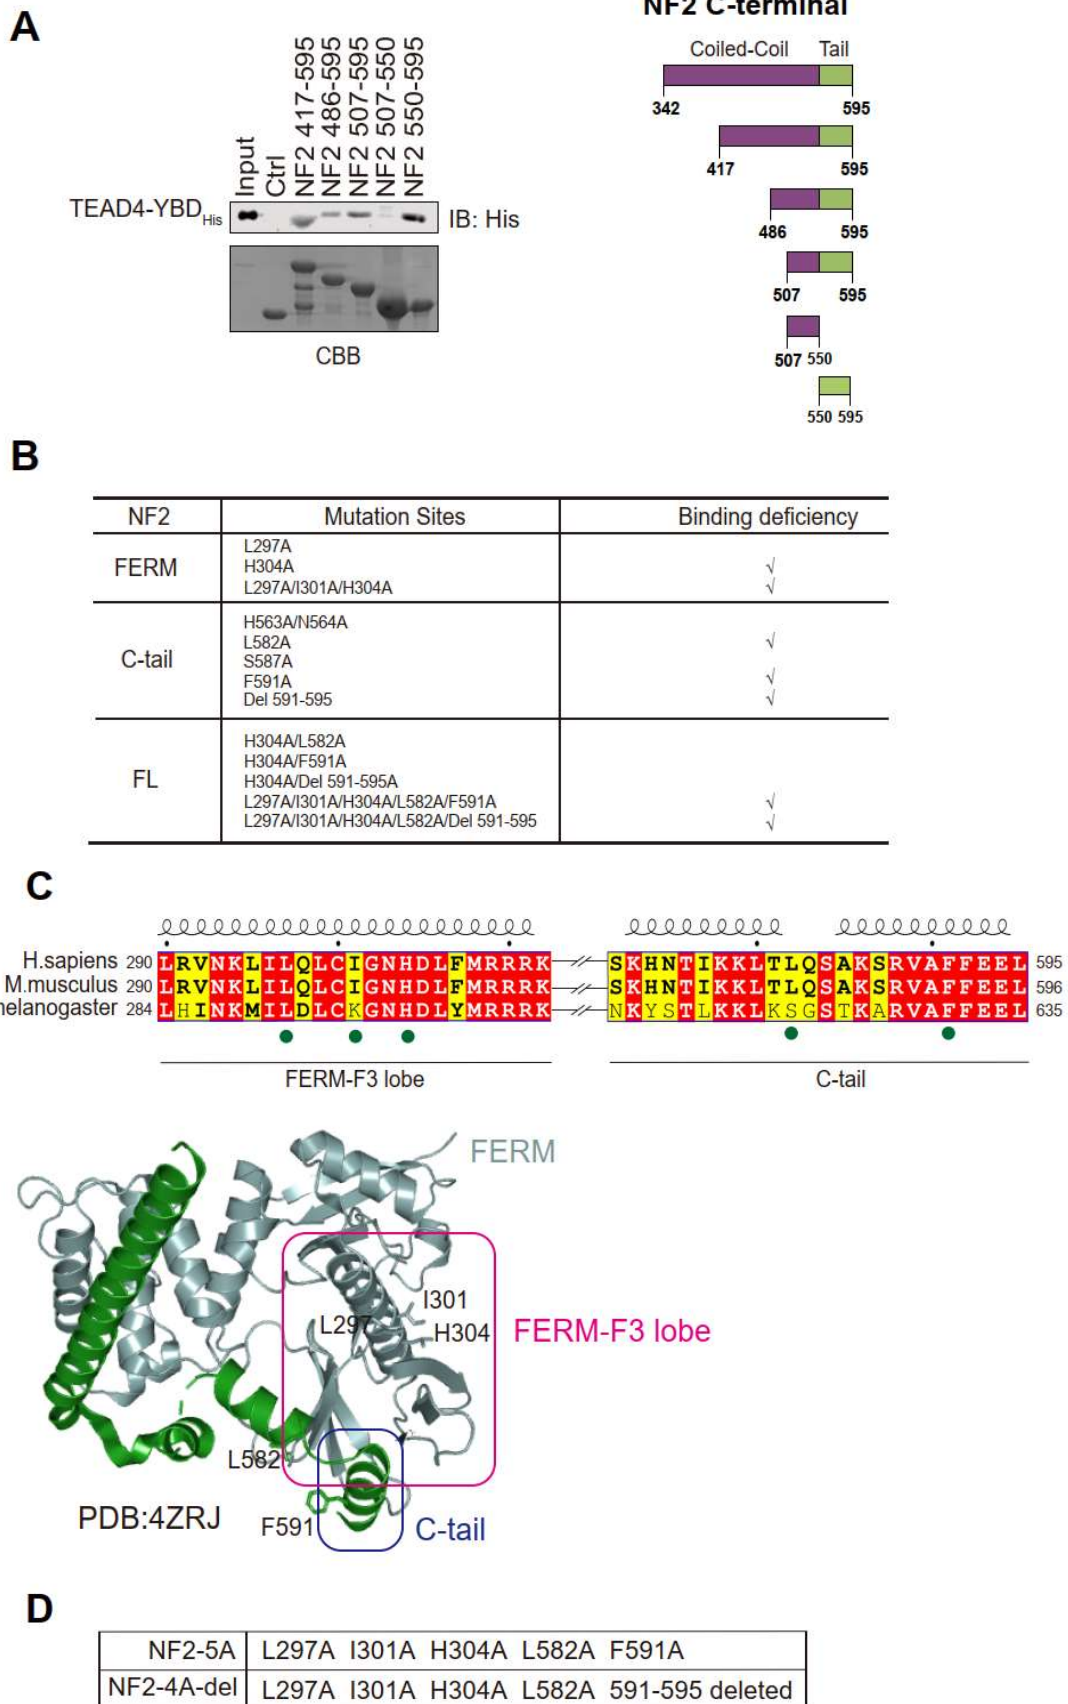

**Figure supplement 2.** Characterization of the interaction between NF2 and TEAD4.

(A) The GST-pull down assay was performed to assess the interaction between TEAD4-YBD and NF2 C-terminal truncations. CBB, Coomassie brilliant blue. The schematic views of NF2 C-terminal truncations showed in right panel. Related to Figure 2.

(B) The indicated residues on the surface of NF2 were screened for the interaction with TEAD4 by GST binding assay. N/A, not available. Related to Figure 3.

(C) The five key residues of NF2 were pinpointed to mediate interaction with TEAD4.

(D) Table of NF2 mutation sites applied in this study.

**Figure supplement 2-source data 1.** Whole SDS-PAGE images and uncropped blots represented in Figure *supplement 2A*. TEAD4-YBD<sub>His</sub> and GST-NF2 fragment protein levels in GST pull-down assay.

## Figure S3

A

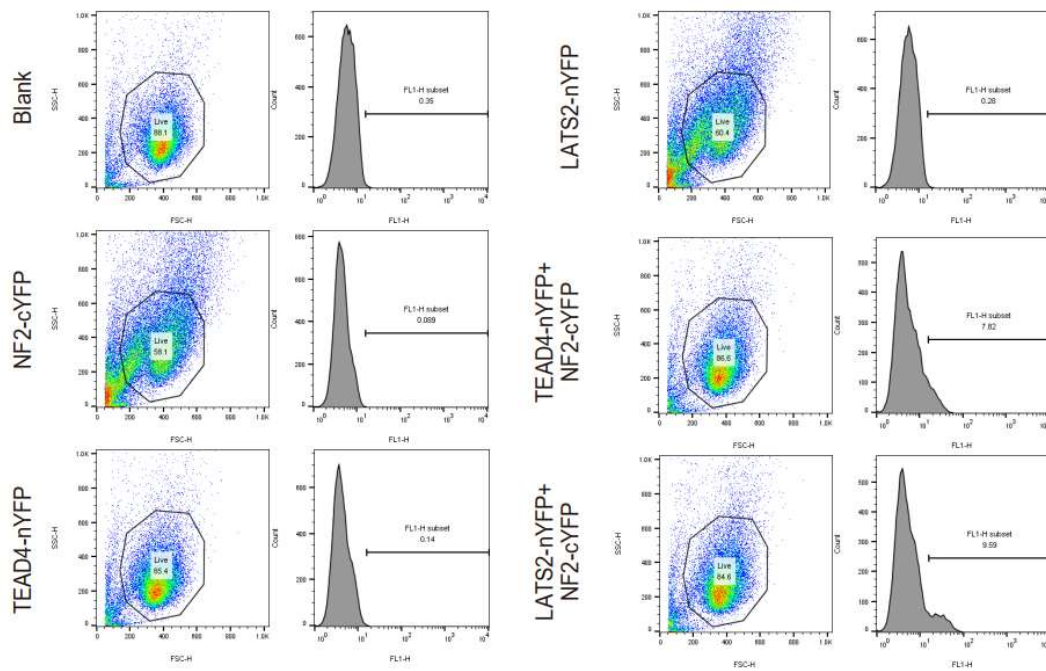

**Figure supplement 3.** The flow cytometry to measure fluorescence signals of indicated cells from BiFC assay.

(A) Fluorescence signals of the cells used in BiFC assay were sequentially measured and quantified by flow cytometry. Gating strategies used for flow cytometry and cells were selected in the FSC-H/SSC-H dot plot to remove debris. Quantification of signals from flow cytometry showed in Figure 4B.

## Figure S4

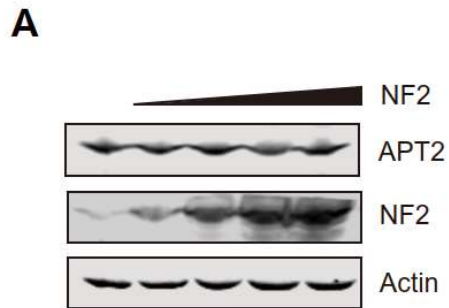

**Figure supplement 4.** The overexpression of NF2 in cells does not affect APT2 protein levels.

(A) NCI-H226 cells transfected Myc-NF2 to determine the protein levels of APT2 via immunoblotting.

**Figure supplement 4-source data 1.** Whole uncropped blots represented in *Figure supplement 4A*. APT2, NF2 and beta-actin protein levels in NCI-H226 cells.
